# Supplementary material
Source: Springer Nature journal article supplement (https://www.springermedizin.de/resource/supplementary/12881_2009_602_MOESM2_ESM.pdf/9451042)
Supplement: MOESM2 [file 9451042]

**Meta-analysis of 5 EUROSPAN GWAS: 322,498 SNPs**  
Genome-wide significance threshold:  $0.05/322,498 = 1.55 \times 10^{-7}$

Discovery stage

Select SNPs promising for replication (*hypothesis generation process*):

- (i) p value <  $10^{-5}$
- (ii) 2 p values, one <  $10^{-4}$  and one <  $10^{-3}$  within 100 Kb
- (iii) 3+ p values <  $10^{-3}$  within 100 Kb

No. of SNPs identified = **91**

**Using SNPs to identify genetic loci**

1) SNP within a gene

2) SNP close to a gene

3) SNP in a gene desert

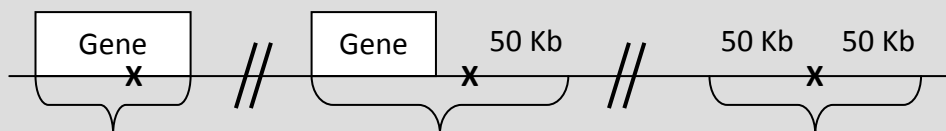

**29 loci identified: 14 within a gene; 8 close to a gene; 7 in a gene desert**

Replication stage

**For each of the 29 loci**

**popgen**

Test all  $K_1$  SNPs  
 $k_1$  will have a p value  $\leq 0.05$

**Korcula**

Test all  $K_2$  SNPs  
 $k_2$  will have a p value  $\leq 0.05$

**Region-specific p value**

$$p_1 = 1 - F_{K_1, 0.05}(k_1 - 1)$$
$$F(k_1) = \text{Binomial}(K_1, 0.05)$$

**Region-specific p value**

$$p_2 = 1 - F_{K_2, 0.05}(k_2 - 1)$$
$$F(k_2) = \text{Binomial}(K_2, 0.05)$$

**Meta-analysis of region-specific p values:**

$$-2(\log_e p_1 + \log_e p_2)$$

29 region-specific p-values from 29 independent tests  
Significance threshold (Bonferroni) =  $0.05/29 = 0.0017$   
False Discovery Rate,  $\alpha = 0.05$

No. of replicated regions = **3**  
(p values =  $1.0 \times 10^{-6}$ ,  $1.7 \times 10^{-4}$ ,  $3.6 \times 10^{-3}$ )
